# Supplementary figures and images for: Structural ordering of self-assembled alkylene-bridged silsesquioxanes probed by X-ray diffraction experiments
Source: Royal Society of Chemistry journal article supplement (doi:10.1039/b510893d), 2005-01-01

ESI : X-Ray diffraction curves of **L9** and **A9** in the  $q$  range of 0.2 to 2  $\text{\AA}^{-1}$

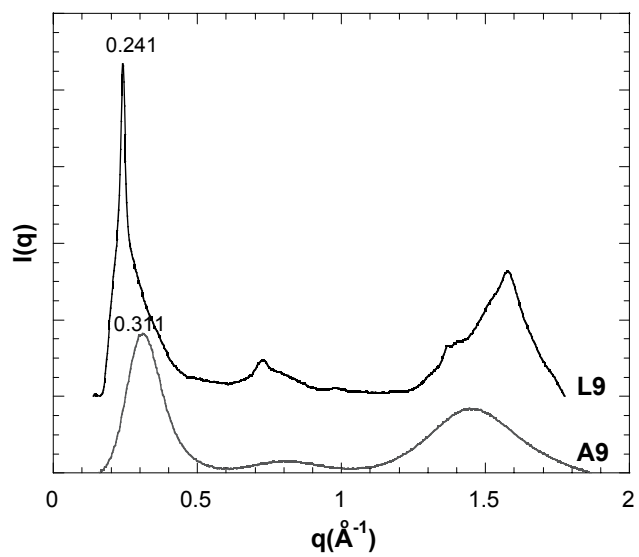

Supplement: b510893d.pdf [file b510893d.pdf]
